# Supplementary material
Source: PubMed Central journal article supplement (PMC3570707)
Supplement: NIHMS433872-supplement-1_si_001.pdf [file NIHMS433872-supplement-1_si_001.pdf]

## Supporting Information

### **Bioreducible polymers as a determining factor for polyplex decomplexation rate and transfection**

Hee Sook Hwang<sup>†,‡</sup>, Han Chang Kang<sup>‡,§</sup>, You Han Bae<sup>†,#,\*</sup>

<sup>†</sup> Department of Pharmaceutics and Pharmaceutical Chemistry, The University of Utah,  
421 Wakara Way, Suite 318, Salt Lake City, Utah 84108, USA

<sup>§</sup> Department of Pharmacy and Integrated Research Institute of Pharmaceutical Sciences, College  
of Pharmacy, The Catholic University of Korea, 43 Jibong-ro, Wonmi-gu, Bucheon-si,  
Gyeonggi-do, 420-743, Republic of Korea

<sup>#</sup> Utah-Inha Drug Delivery Systems (DDS) and Advanced Therapeutics Research Center, 7-50  
Songdo-dong, Yeonsu-gu, Incheon, 406-840, Republic of Korea

<sup>‡</sup> HSH and HCK equally contributed to this work.

\* Correspondence to:

Professor You Han Bae, Ph.D., Department of Pharmaceutics and Pharmaceutical Chemistry,  
The University of Utah, 421 Wakara Way, Suite 318, Salt Lake City, Utah 84108, USA.  
Tel: +1-801-585-1518; Fax: +1-801-585-3614.

E-mail address: you.bae@utah.edu

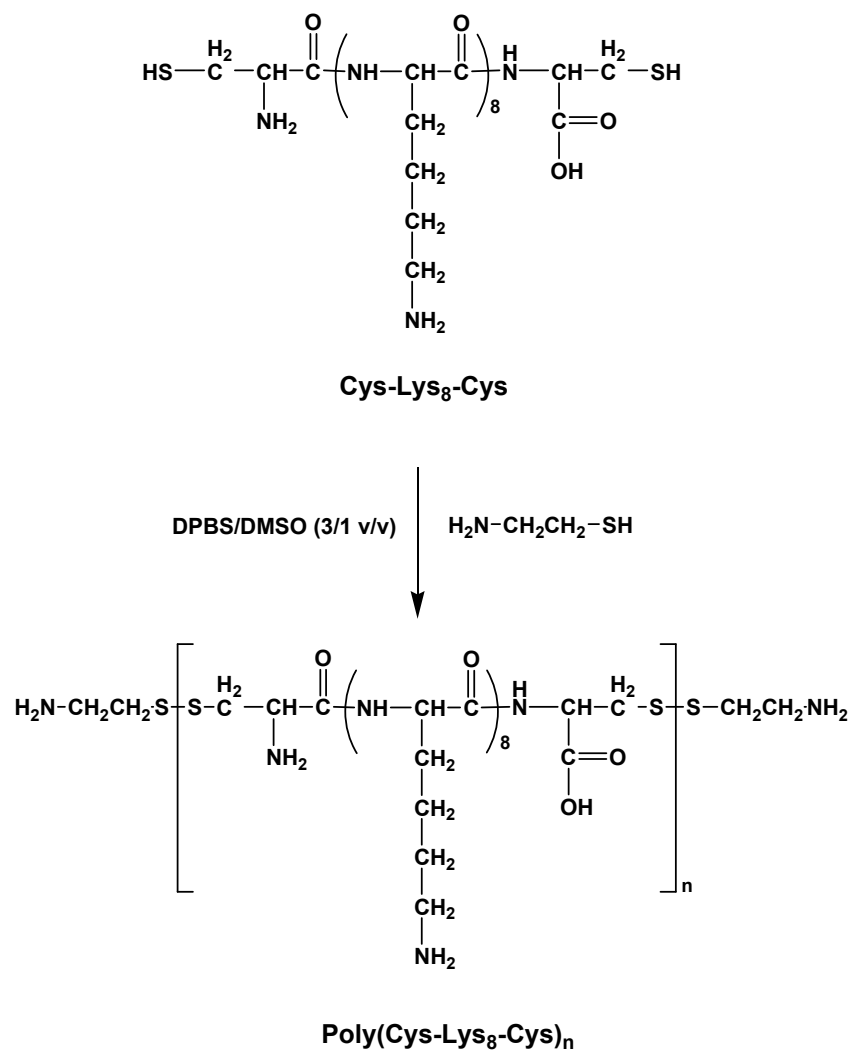

Figure S1. Synthetic scheme of reducible poly(Cys-Lys<sub>8</sub>-Cys) (RPLL)

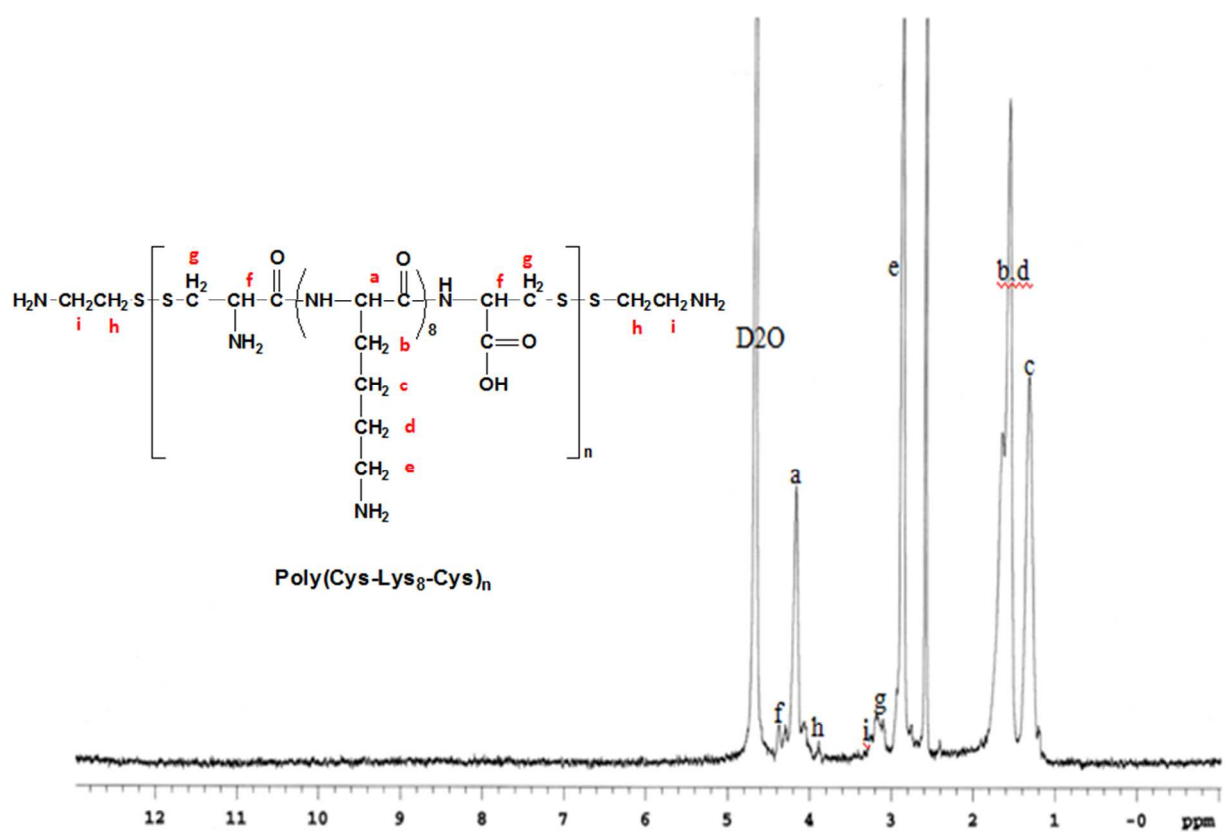

Figure S2.  $^1\text{H-NMR}$  analysis of RPLL in  $\text{D}_2\text{O}$

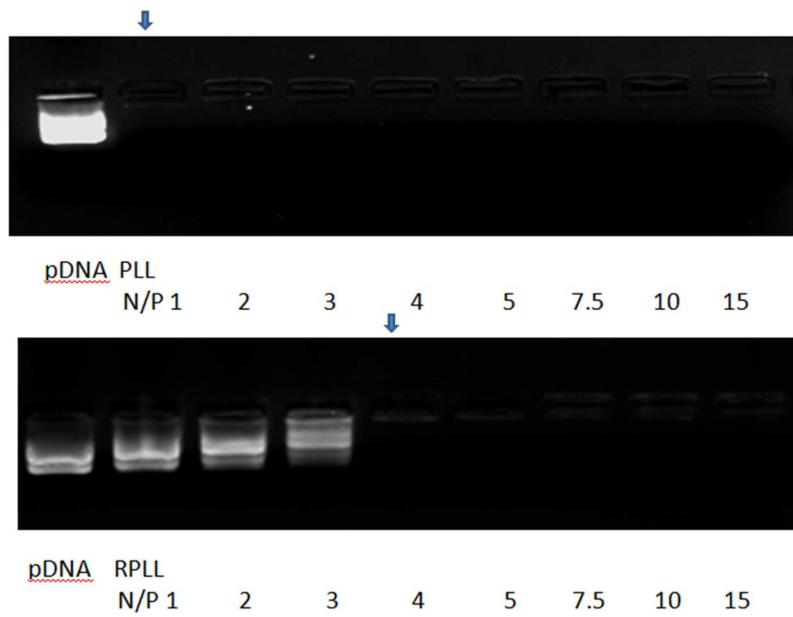

Figure S3. Condensation of pDNA with either PLL or RPLL in agarose gel

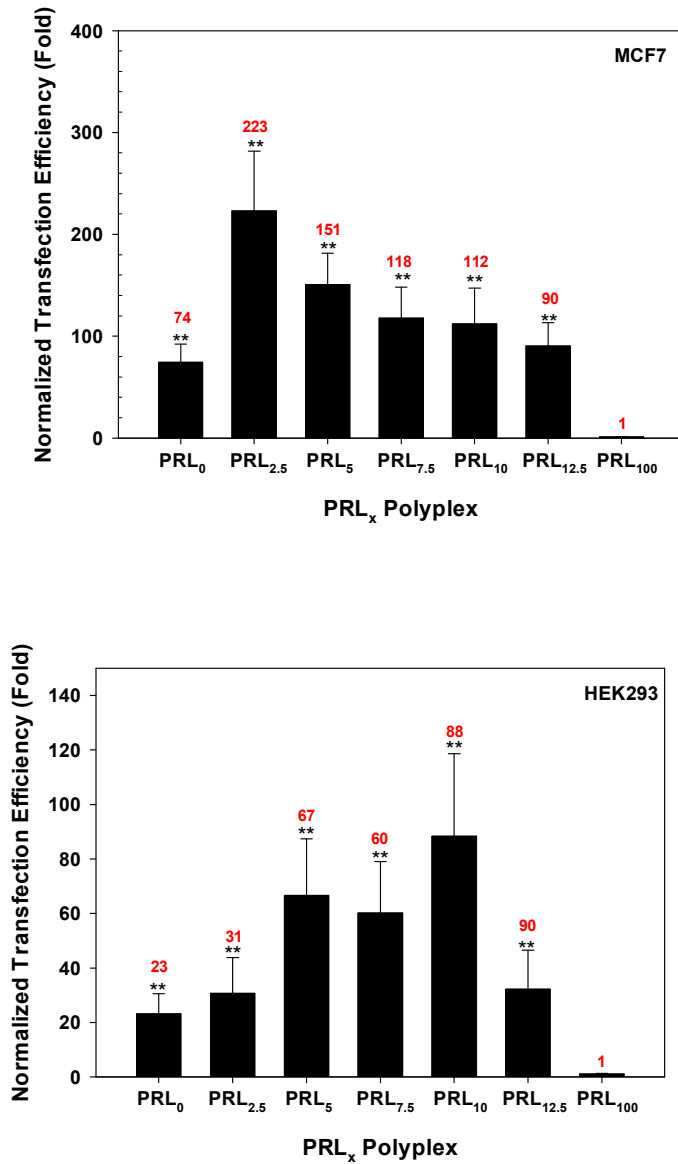

Figure S4. Normalized Transfection efficiencies of PLL<sub>100-x</sub>RPLL<sub>x</sub>/pDNA complexes (PRL<sub>x</sub> polyplexes) (N/P 5) in MCF7 cells and HEK293 cells. PLL/pDNA and RPLL/pDNA complexes were denominated as PRL<sub>0</sub> and PRL<sub>100</sub> polyplexes, respectively. Transfection efficiency of PRL<sub>100</sub> polyplexes was set as a unity. \*\*  $p < 0.01$  vs. PRL<sub>100</sub> polyplex (Mean  $\pm$  Standard Error;  $n \geq 4$ )

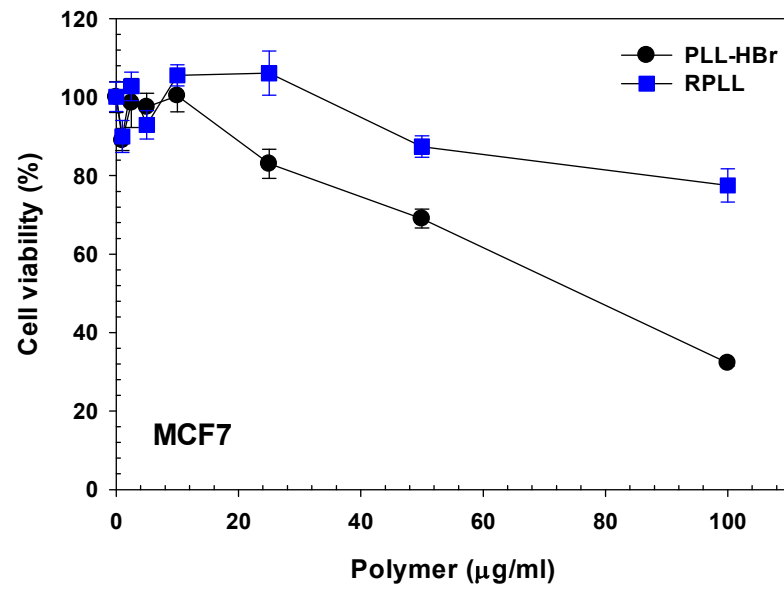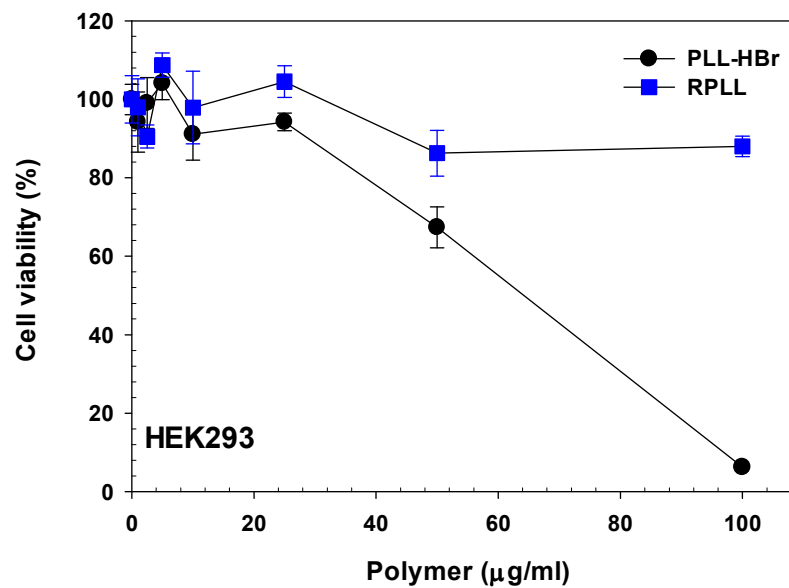

Figure S5. Dose-dependent cytotoxicity of PLL and RPLL in MCF7 and HEK293 cells. The cells were exposed to the polymers for 24 hr in the serum-containing medium. (Mean  $\pm$  Standard Error; n = 6)
